# Supplementary material for: Hydrogen Bonding in Crystals of Pyrrol-2-yl Chloromethyl Ketone Derivatives and Methyl Pyrrole-2-Carboxylate
Source: MDPI journal article supplement (doi:10.3390/cryst12111523), 2022-10-26

# Hydrogen bonding in crystals of the pyrrol-2-yl chloromethyl ketone derivatives and the methyl pyrrole-2-carboxylate

Małgorzata Domagała <sup>a\*</sup>, Alina T. Dubis <sup>b</sup>, Sławomir Wojtulewski <sup>b</sup>, Manfred Zabel <sup>c</sup> and Arno Pfitzner <sup>c</sup>

<sup>a</sup> Faculty of Chemistry, University of Łódź, Pomorska 163/165, 90236 Łódź, Poland;  
malgorzata.domagala@chemia.uni.lodz.pl

<sup>b</sup> Faculty of Chemistry, University of Białystok, Ciołkowskiego 1K, 15245 Białystok, Poland;

<sup>c</sup> Institute of Inorganic Chemistry, University of Regensburg, 93040 Regensburg, Germany;

## Supplementary materials

|        |                                                                                                                                                                |
|--------|----------------------------------------------------------------------------------------------------------------------------------------------------------------|
| page 2 | Table S1. Selected geometrical parameters [Å, °] between atoms in non-hydrogen skeleton of molecules                                                           |
| page 3 | Table S2. Fingerprint plots of compound I-III showing the most important interactions occurring in crystals of I, II and III taken from the Hirshfeld surface. |
| page 3 | Figure S1. Full Interaction Maps for investigated structures I-III with interacting molecules                                                                  |
| page 4 | Scheme S1. Scheme of the searching fragment of pyrrol-2-yl ketone                                                                                              |
| page 4 | Scheme S2. Scheme of the searching fragment of molecule of ester                                                                                               |
| page 4 | Table S3. Values of bond lengths [Å] in the structures of the pyrrol-2-yl ketones derivatives found in CSD                                                     |
| page 5 | Table S4. Values of bond angles [°] in the structures of the pyrrol-2-yl ketones derivatives found in CSD                                                      |
| page 5 | Table S5. Values of bond lengths [Å] in the structures of the pyrrol-2-carboxylate derivatives found in CSD                                                    |
| page 5 | Table S6. Values of bond angles [°] in the structures of the pyrrol-2-carboxylate derivatives found in CSD                                                     |
| page 6 | Figure S2. Graphical representation of the structures of the pyrrol-2-yl ketones derivatives found in CSD                                                      |
| page 7 | Figure S3. Graphical representation of the structures of the pyrrol-2-carboxylate derivatives found in CSD                                                     |

Table S1. Selected geometrical parameters [ $\text{\AA}$ ,  $^\circ$ ] between atoms in non-hydrogen skeleton of molecules I-III.

|             | I        | II       | III      |
|-------------|----------|----------|----------|
| N1-C1       | 1.480(2) |          |          |
| N1-C5       | 1.362(2) | 1.359(3) | 1.355(2) |
| N1-C2       | 1.393(2) | 1.374(3) | 1.371(2) |
| C2-C3       | 1.413(2) | 1.393(3) | 1.382(2) |
| C3-C4       | 1.408(2) | 1.403(3) | 1.403(2) |
| C4-C5       | 1.401(3) | 1.381(3) | 1.381(2) |
| C2-C6       | 1.451(2) | 1.447(3) | 1.454(2) |
| C6-O6       | 1.230(2) | 1.227(3) | 1.220(2) |
| C6-C7/O7    | 1.550(2) | 1.518(3) | 1.340(1) |
| C7-Cl8      | 1.772(2) | 1.774(2) | -        |
| C7-Cl9      | 1.796(2) | -        | -        |
| O7-C8       | -        | -        | 1.447(2) |
| C5-N1-C2    | 108.7(1) | 109.2(2) | 109.3(1) |
| N1-C2-C3    | 107.7(1) | 107.5(2) | 107.9(1) |
| N1-C2-C6    | 123.5(2) | 120.8(2) | 120.5(1) |
| C3-C2-C6    | 128.8(2) | 131.7(2) | 131.7(1) |
| C4-C3-C2    | 107.3(2) | 107.5(2) | 107.2(1) |
| C5-C4-C3    | 107.0(2) | 107.2(2) | 107.4(1) |
| N1-C5-C4    | 109.3(2) | 108.7(2) | 108.3(1) |
| O6-C6-C2    | 125.0(2) | 122.3(2) | 124.3(1) |
| O6-C6-C7/O7 | 120.3(2) | 122.2(2) | 124.1(1) |
| C2-C6-C7/O7 | 114.6(1) | 115.5(2) | 111.6(1) |
| C6-C7-Cl8   | 111.7(1) | 112.0(2) | -        |
| C6-C7-Cl9   | 107.7(1) | -        | -        |
| Cl8-C7-Cl9  | 109.5(1) | -        | -        |
| C6-O7-C8    | -        | -        | 116.4(1) |

Table S2. Fingerprint plots of compound I-III showing the most important interactions occurring in crystals of I, II, and III taken from the Hirshfeld surface.

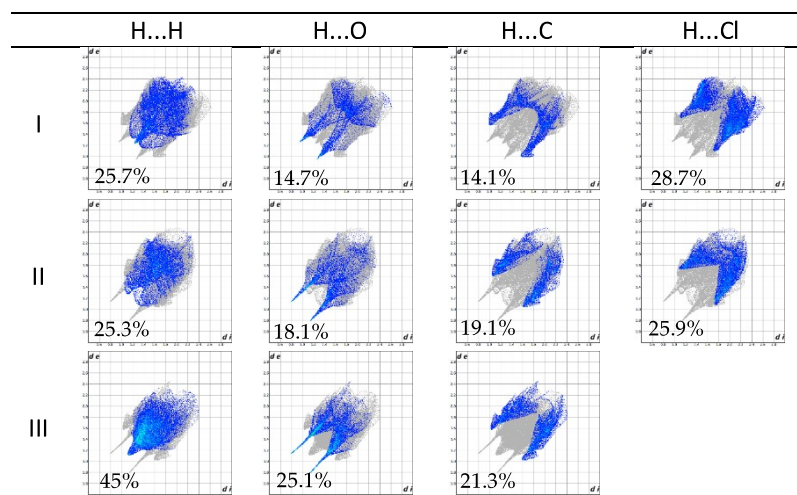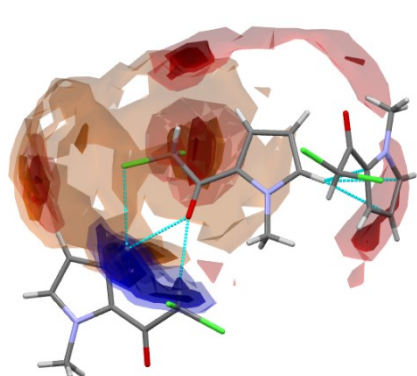

I

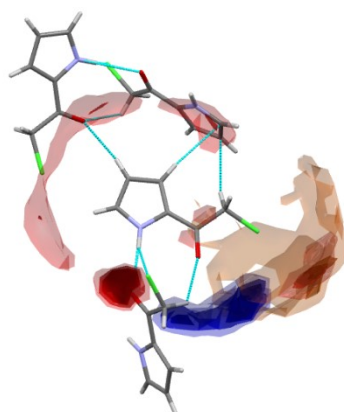

II

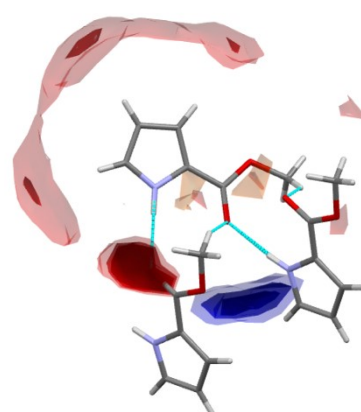

III

**Figure S1.** Full Interaction Maps for investigated structures I-III with interacting molecules.

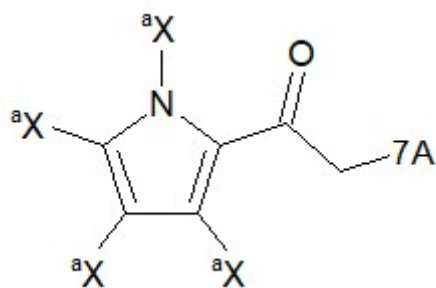

Scheme S1. Scheme of searching fragment of pyrrol-2-yl ketone

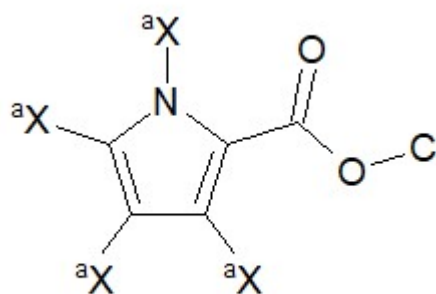

Scheme S2. Scheme of the first searching fragment of molecule of ester, which give 100 hits. It was modifying by changing any-atoms X by H-atoms and C-atom from ester group becomes acyclic.

Table S3. Values of bond lengths [Å] in the structures of the pyrrol-2-yl ketones derivatives found in CSD

| Refcode         | N(1) – C(1) | N(1) – C(2) | C(2) – C(3) | C(3) – C(4) | C(4) – C(5) | C(5) – N(1) | C(2) – C(6) | C(6) – O(6) | C(6) – C(7) | C(7) – Hal |
|-----------------|-------------|-------------|-------------|-------------|-------------|-------------|-------------|-------------|-------------|------------|
| <b>AZEHAO</b>   | 0.863       | 1.376       | 1.393       | 1.404       | 1.387       | 1.351       | 1.438       | 1.219       | 1.547       | 1.322      |
| <b>BETNOF</b>   | 1.460       | 1.391       | 1.390       | 1.385       | 1.372       | 1.346       | 1.432       | 1.215       | 1.566       | 1.768      |
| <b>BETPAT</b>   | 1.460       | 1.393       | 1.388       | 1.389       | 1.370       | 1.346       | 1.441       | 1.215       | 1.561       | 1.782      |
| <b>BETPEX</b>   | 1.458       | 1.394       | 1.392       | 1.388       | 1.370       | 1.344       | 1.427       | 1.225       | 1.563       | 1.786      |
| <b>BETPIB</b>   | 1.458       | 1.391       | 1.389       | 1.385       | 1.365       | 1.346       | 1.434       | 1.218       | 1.557       | 1.777      |
| <b>BETPOH</b>   | -           | 1.383       | 1.393       | 1.396       | 1.382       | 1.345       | 1.442       | 1.219       | 1.562       | 1.755      |
| <b>GOFQEZ</b>   | -           | 1.389       | 1.421       | 1.400       | 1.404       | 1.340       | 1.421       | 1.234       | 1.544       | 1.323      |
| <b>HUZBIN</b>   | 1.465       | 1.393       | 1.371       | 1.394       | 1.372       | 1.332       | 1.457       | 1.199       | 1.557       | 1.768      |
| <b>JODHER</b>   | -           | 1.376       | 1.398       | 1.393       | 1.386       | 1.342       | 1.439       | 1.222       | 1.555       | 1.763      |
| <b>UCEKET</b>   | 1.469       | 1.404       | 1.386       | 1.381       | 1.375       | 1.342       | 1.447       | 1.209       | 1.565       | 1.749      |
| <b>UHIQEI</b>   | 1.469       | 1.386       | 1.394       | 1.393       | 1.385       | 1.345       | 1.436       | 1.220       | 1.539       | 1.758      |
| <b>WEYYUV</b>   | 1.476       | 1.391       | 1.386       | 1.377       | 1.352       | 1.340       | 1.444       | 1.209       | 1.563       | 1.767      |
| <b>WEYYUV01</b> | 1.472       | 1.400       | 1.405       | 1.400       | 1.385       | 1.356       | 1.445       | 1.223       | 1.581       | 1.788      |

Table S4. Values of bond angles [°] in the structures of the pyrrol-2-yl ketones derivatives found in CSD

| Refcode  | C(5) –<br>N(1) –<br>C(2) | C(2) –<br>C(6) –<br>O(6) | O(6) –<br>C(6) –<br>C(7) | C(6) –<br>C(7) –<br>Hal | N(1) –<br>C(2) –<br>C(3) | C(2) –<br>C(3) –<br>C(4) | C(3) –<br>C(4) –<br>C(5) | C(4) –<br>C(5) –<br>N(1) | N(1) –<br>C(2) –<br>C(6) | C(3) –<br>C(2) –<br>C(6) | C(2) –<br>C(6) –<br>C(7) |
|----------|--------------------------|--------------------------|--------------------------|-------------------------|--------------------------|--------------------------|--------------------------|--------------------------|--------------------------|--------------------------|--------------------------|
| AZHAO    | 108.45                   | 124.67                   | 117.75                   | 110.87                  | 108.09                   | 107.26                   | 106.54                   | 109.65                   | 119.68                   | 132.21                   | 117.55                   |
| BETNOF   | 108.11                   | 125.59                   | 118.92                   | 110.15                  | 106.99                   | 108.01                   | 107.00                   | 109.88                   | 122.56                   | 130.45                   | 115.48                   |
| BETPAT   | 108.02                   | 123.50                   | 116.15                   | 109.22                  | 107.18                   | 107.79                   | 107.12                   | 109.89                   | 121.09                   | 131.71                   | 120.34                   |
| BETPEX   | 108.37                   | 124.41                   | 116.04                   | 107.93                  | 106.54                   | 108.22                   | 106.85                   | 110.01                   | 122.23                   | 131.18                   | 119.54                   |
| BETPIB   | 107.90                   | 123.66                   | 116.01                   | 112.07                  | 106.94                   | 108.02                   | 106.97                   | 110.16                   | 121.51                   | 131.38                   | 120.21                   |
| BETPOH   | 109.56                   | 122.39                   | 118.35                   | 110.76                  | 107.23                   | 106.99                   | 107.92                   | 108.29                   | 118.57                   | 134.15                   | 119.23                   |
| GOFQEZ   | 110.38                   | 124.24                   | 115.46                   | 110.85                  | 106.70                   | 106.74                   | 107.93                   | 108.23                   | 115.82                   | 137.47                   | 120.27                   |
| HUZZBIN  | 109.08                   | 124.07                   | 118.02                   | 111.89                  | 107.86                   | 106.24                   | 108.80                   | 108.03                   | 120.81                   | 131.27                   | 117.90                   |
| JODHER   | 110.05                   | 123.14                   | 117.83                   | 110.62                  | 107.52                   | 106.19                   | 108.67                   | 107.57                   | 117.73                   | 134.73                   | 119.02                   |
| UCEKET   | 107.42                   | 125.29                   | 117.51                   | 110.45                  | 107.74                   | 107.17                   | 107.94                   | 109.73                   | 120.97                   | 131.28                   | 117.20                   |
| UHIQJ    | 108.84                   | 125.25                   | 120.09                   | 111.68                  | 107.20                   | 107.64                   | 107.04                   | 109.25                   | 123.59                   | 129.17                   | 114.60                   |
| WEYYUV   | 108.05                   | 124.76                   | 117.14                   | 110.36                  | 106.93                   | 107.26                   | 108.14                   | 109.62                   | 121.20                   | 131.72                   | 118.09                   |
| WEYYUV01 | 108.45                   | 124.92                   | 117.13                   | 109.40                  | 107.08                   | 107.62                   | 107.23                   | 109.62                   | 120.80                   | 131.93                   | 117.93                   |

Table S5. Values of bond lengths [Å] in the structures of the pyrrol-2-carboxylate derivatives found in CSD

| Refcode | N(1) –<br>C(2) | C(2) –<br>C(3) | C(3) –<br>C(4) | C(4) –<br>C(5) | C(5) –<br>N(1) | C(2) –<br>C(6) | C(6) –<br>O(6) | C(6) –<br>O(7) | O(7) –<br>C(8) |
|---------|----------------|----------------|----------------|----------------|----------------|----------------|----------------|----------------|----------------|
| CUHKUM  | 1.366          | 1.357          | 1.391          | 1.355          | 1.338          | 1.442          | 1.206          | 1.333          | 1.443          |
| CUHLAT  | 1.366          | 1.370          | 1.384          | 1.356          | 1.341          | 1.439          | 1.209          | 1.331          | 1.445          |
| CUHLEX  | 1.372          | 1.366          | 1.399          | 1.361          | 1.347          | 1.440          | 1.215          | 1.340          | 1.447          |
| DUCYOQ  | 1.362          | 1.382          | 1.403          | 1.377          | 1.356          | 1.448          | 1.220          | 1.342          | 1.439          |
| EHAZIW  | 1.380          | 1.380          | 1.416          | 1.377          | 1.355          | 1.453          | 1.211          | 1.351          | 1.462          |
| EJALEH  | 1.369          | 1.373          | 1.394          | 1.365          | 1.350          | 1.444          | 1.214          | 1.331          | 1.447          |
| GAQDEJ  | 1.366          | 1.373          | 1.392          | 1.370          | 1.348          | 1.438          | 1.219          | 1.346          | 1.447          |
| PESNEH  | 1.375          | 1.373          | 1.401          | 1.373          | 1.350          | 1.448          | 1.218          | 1.346          | 1.445          |
| PESNIL  | 1.372          | 1.368          | 1.401          | 1.351          | 1.347          | 1.441          | 1.210          | 1.334          | 1.437          |
| SAZLAH  | 1.371          | 1.373          | 1.385          | 1.365          | 1.345          | 1.440          | 1.208          | 1.346          | 1.442          |
| YICNOO  | 1.367          | 1.366          | 1.392          | 1.357          | 1.352          | 1.440          | 1.209          | 1.345          | 1.446          |

Table S6. Values of bond angles [°] in the structures of the pyrrol-2-carboxylate derivatives found in CSD

| Refcode | C(5) –<br>N(1) –<br>C(2) | N(1) –<br>C(2) –<br>C(3) | C(2) –<br>C(3) –<br>C(4) | C(3) –<br>C(4) –<br>C(5) | C(4) –<br>C(5) –<br>N(1) | N(1) –<br>C(2) –<br>C(6) | C(3) –<br>C(2) –<br>C(6) | C(2) –<br>C(6) –<br>O(6) | O(6) –<br>C(6) –<br>O(7) | C(6) –<br>O(7) –<br>C(8) | C(2) –<br>C(6) –<br>O(7) |
|---------|--------------------------|--------------------------|--------------------------|--------------------------|--------------------------|--------------------------|--------------------------|--------------------------|--------------------------|--------------------------|--------------------------|
| CUHKUM  | 109.69                   | 107.13                   | 107.52                   | 107.68                   | 107.98                   | 120.91                   | 131.85                   | 124.62                   | 123.42                   | 117.15                   | 111.95                   |
| CUHLAT  | 109.79                   | 106.55                   | 107.92                   | 107.52                   | 108.21                   | 120.92                   | 132.46                   | 124.05                   | 123.44                   | 116.64                   | 112.52                   |
| CUHLEX  | 108.97                   | 107.60                   | 107.44                   | 107.28                   | 108.71                   | 120.07                   | 132.29                   | 124.99                   | 122.39                   | 115.98                   | 112.61                   |
| DUCYOQ  | 109.8                    | 107.7                    | 107.2                    | 107.4                    | 108.0                    | 120.9                    | 131.4                    | 124.1                    | 123.9                    | 116.6                    | 123.9                    |
| EHAZIW  | 108.80                   | 108.02                   | 107.18                   | 106.92                   | 109.08                   | 119.97                   | 132.01                   | 125.81                   | 123.26                   | 115.71                   | 110.92                   |
| EJALEH  | 109.52                   | 107.37                   | 107.25                   | 107.91                   | 107.93                   | 120.60                   | 132.01                   | 124.97                   | 123.76                   | 117.16                   | 111.26                   |
| GAQDEJ  | 109.33                   | 107.37                   | 107.74                   | 107.12                   | 108.43                   | 121.02                   | 131.61                   | 125.76                   | 122.48                   | 116.63                   | 111.76                   |
| PESNEH  | 109.26                   | 107.50                   | 107.56                   | 107.22                   | 108.46                   | 120.10                   | 132.39                   | 124.81                   | 123.18                   | 116.36                   | 112.01                   |
| PESNIL  | 108.53                   | 108.06                   | 106.64                   | 107.87                   | 108.89                   | 121.47                   | 130.42                   | 125.28                   | 123.83                   | 118.94                   | 110.89                   |
| SAZLAH  | 109.05                   | 107.05                   | 108.00                   | 107.16                   | 108.73                   | 123.66                   | 129.26                   | 124.73                   | 122.99                   | 118.39                   | 112.28                   |
| YICNOO  | 108.64                   | 107.25                   | 108.31                   | 106.57                   | 109.23                   | 123.21                   | 129.34                   | 125.92                   | 122.23                   | 117.05                   | 111.84                   |

Figure S2. Graphical representation of the structures of the pyrrol-2-yl ketones derivatives found in CSD

The colours describes: grey colour - C atom, blue colour - N atom, purple - H atom, red - O atom, green - Cl atom, yellow - F and olive - Br atoms

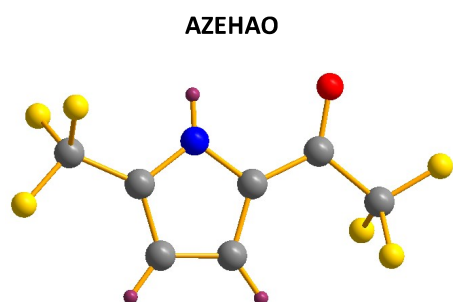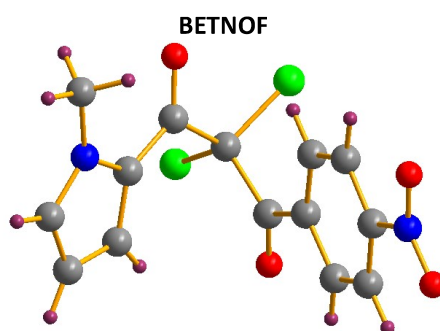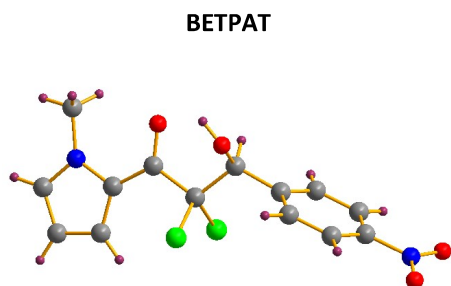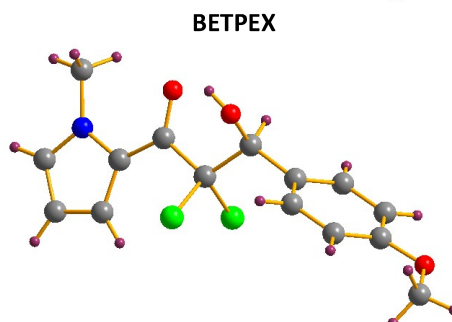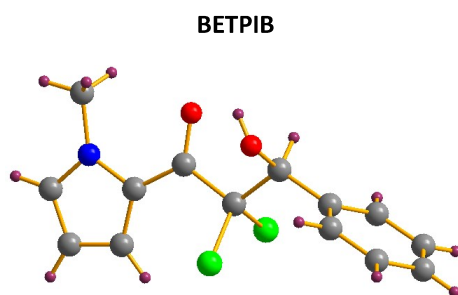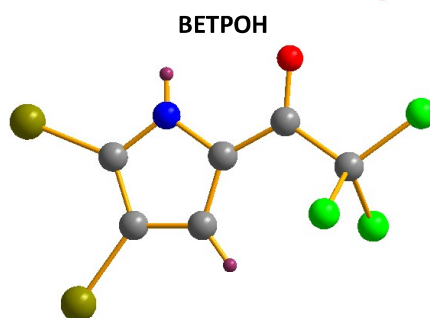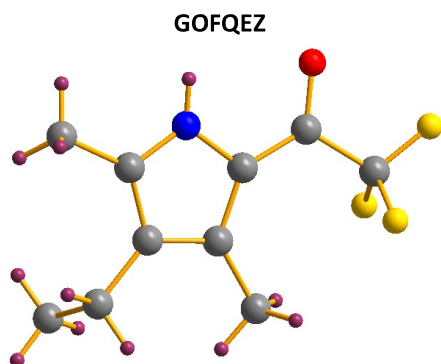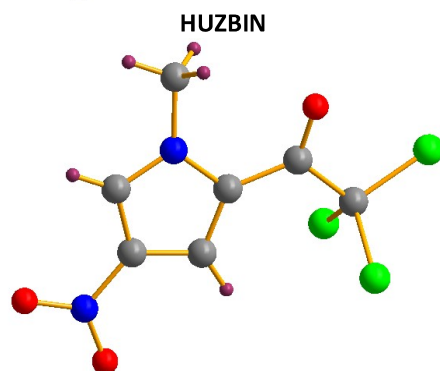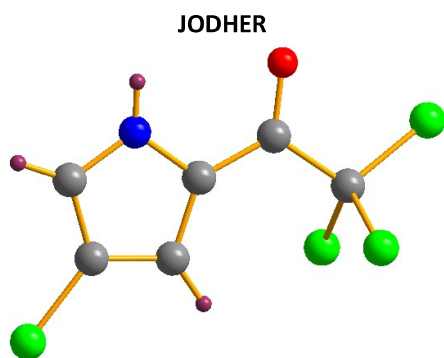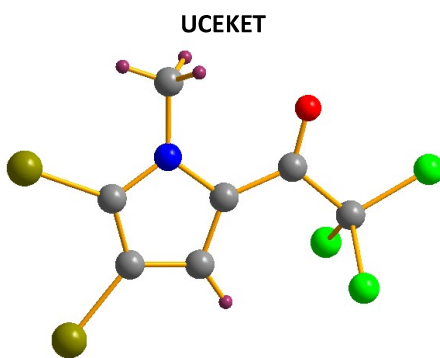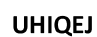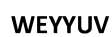

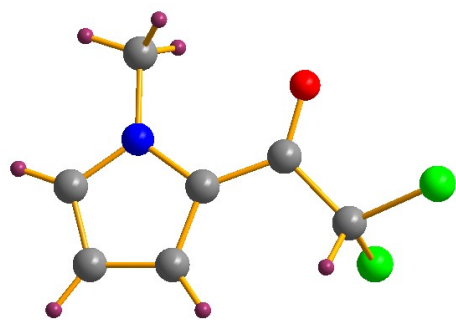

**WEYYUV01**

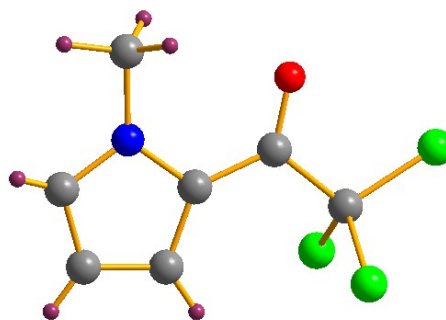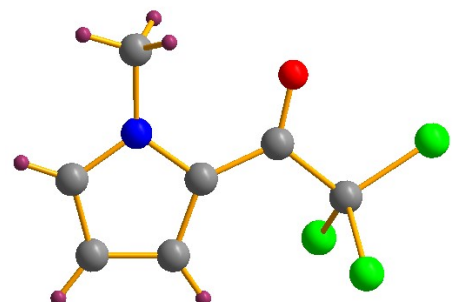

Figure S3. Graphical representation of the structures of the pyrrol-2-carboxylate derivatives found in CSD  
The colours describes: grey colour - C atom, blue colour - N atom, purple - H atom, red - O atom, green - Cl atom.

**CUHKUM**

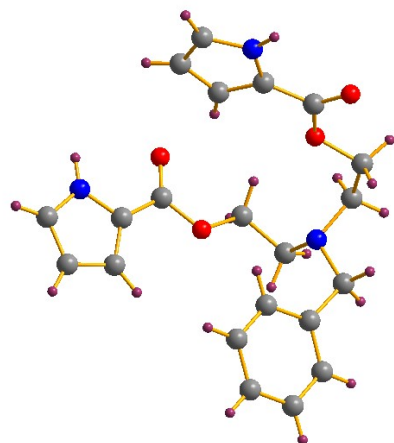

**CUHLEX**

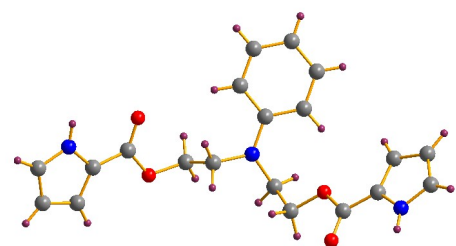

**EJALEH**

**CUHLAT**

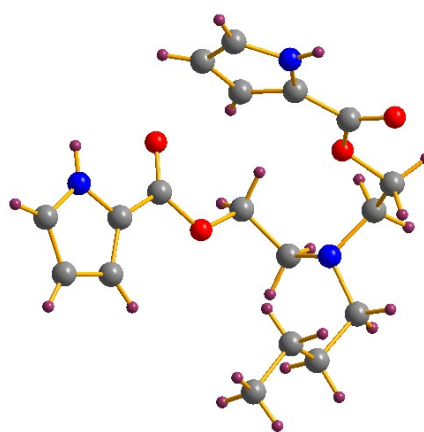

**EHAZIW**

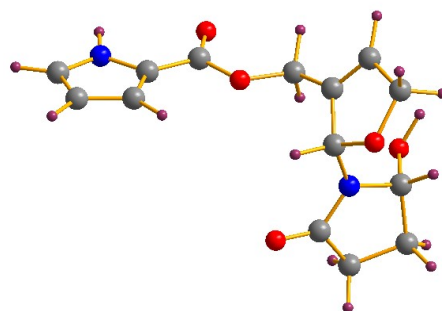

**GAQDEJ**

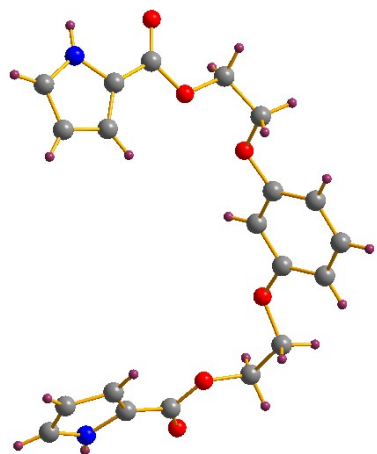

PESNEH

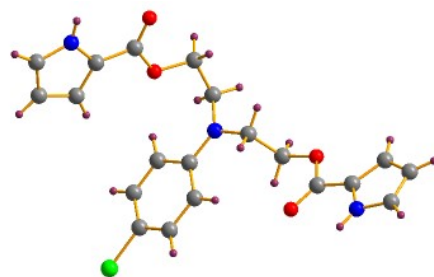

PESNIL

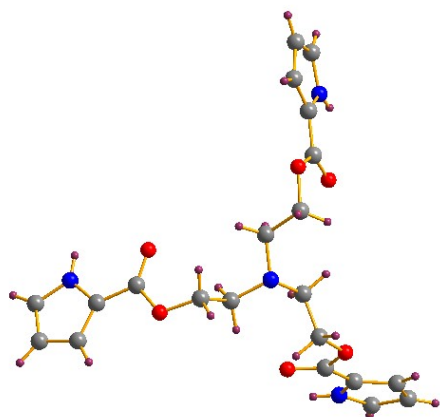

SAZLAH

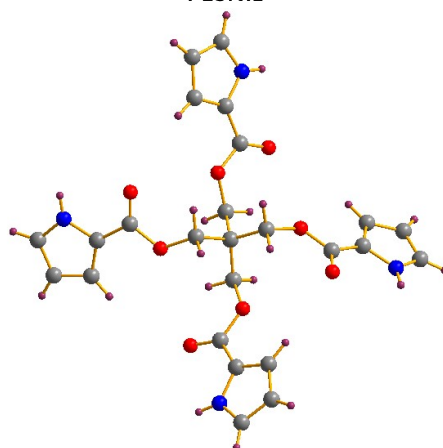

YICNOO

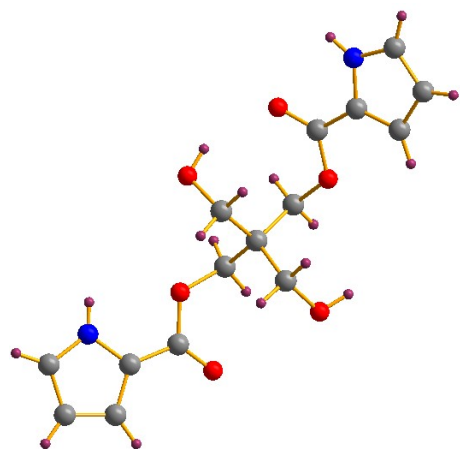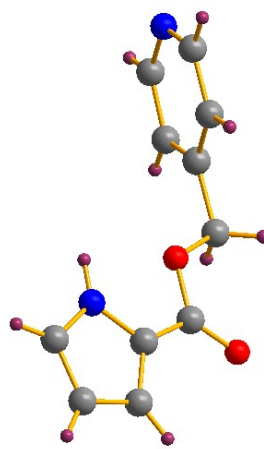

Supplement: s1 [file s1]
